# Supplementary material for: CtIP suppresses primary microRNA maturation and promotes metastasis of colon cancer cells in a xenograft mouse model
Source: PubMed Central journal article supplement — J Biol Chem. 2021 Apr 24;296:100707. doi: 10.1016/j.jbc.2021.100707 (PMC8164041; doi:10.1016/j.jbc.2021.100707), 2021-04-24
Supplement: mmc1.pdf [file mmc1.pdf]

## Supplementary material

### Supplementary figure legends

**Supplementary Figure 1, related to Figure 2.** A. Chromatin fractionation of HCT116 wild type and *CtIP*-KO cells. The data shows different subcellular localization of CtIP and DICER1. B. Western blot shows the expression level of DICER1 is not changed in *CtIP*-KO cells. C. Expression levels of pre-miR302b in wild type and *CtIP*-KO cells were verified by qPCR. The data represent the means  $\pm$  SD of three independent experiments. The *P* value is indicated as  $**P < 0.01$ .

**Supplementary Figure 2, related to Figure 3.** Coomassie blue staining of SDS-PAGE shows the purified proteins used in Figure 3A and 3B.

**Supplementary Figure 3, related to Figure 7.** Non-invasive in vivo fluorescence imaging of tumor progression over time in the orthotopic colorectal cancer model. Top: representative fluorescence images. Scale bars, 1cm. Bottom: quantification of fluorescence intensity. The data represent the means  $\pm$  SD.

**Supplementary Figure 4, related to Figure 7.** A. Expression levels of indicated mature miRNAs in wild type tumor and *CtIP*-KO tumor were verified by qPCR. B. Quantification of tumor weights (left) and frequency of metastases (right) in *CtIP*-KO cells expressing control vector (Ctrl) or miR302b inhibitor. Data represent mean  $\pm$  SD.

### Supplemental Table S1:

Gene-specific primers used in the study (purchased from GeneCopoeia)

| Product ID  | Accession    | Code            |
|-------------|--------------|-----------------|
| HmiR-AN0381 | MIMAT0000684 | hsa-miR-302a-3p |
| HmiR-AN0383 | MIMAT0000715 | hsa-miR-302b-3p |
| HmiR-AN0384 | MIMAT0000717 | hsa-miR-302c-3p |
| HmiR-AN0387 | MIMAT0000718 | hsa-miR-302d-3p |
| HmiR-AN0169 | MIMAT0004595 | hsa-miR-135a-3p |
| HmiR-AN0171 | MIMAT0004698 | hsa-miR-135b-3p |
| HmiRQP9001  | NR_125730    | hsnRNA U6-2     |

### Supplemental Table S2

Other primers used in the study

|            |                          |
|------------|--------------------------|
| Pri-302A F | CACTTAAACGTGGATGTACTTGCT |
|------------|--------------------------|

|            |                           |
|------------|---------------------------|
| Pri-302A R | AAATATATGAGCTGCGGTCAATAC  |
| Pri-302B F | TATGCCATTTTGTTCCTTTCTC    |
| Pri-302B R | CTCCTACTAAAACATGGAAGCAC   |
| Pri-302C F | CTTTAACATGGGGGTACCTGC     |
| Pri-302C R | AGCCCAGTCTTGGAAAAAGTTAG   |
| Pri-302D F | CTTTAACATGGAGGCACTTGCTG   |
| Pri-302D R | GCAACAGTAATGGCCTGTAGCC    |
| Pri-135a F | CTATGGCTTTTATTCCTATGTGA   |
| Pri-135a R | GAGGCAAGTGGGAATAGAGG      |
| Pri-135b F | TATGGCTTTTCATTCCTATGTGAT  |
| Pri-135b R | AAGGTTACCAGATCCCGTGATG    |
| Pre-302B F | GCTCCCTTCAACTTTAACATGGAAG |
| GAPDH F    | CCCTCTGGTGGTGGCCCTT       |
| GAPDH R    | GGCGCCAGACACCCAATCC       |

F: forward; R: reverse

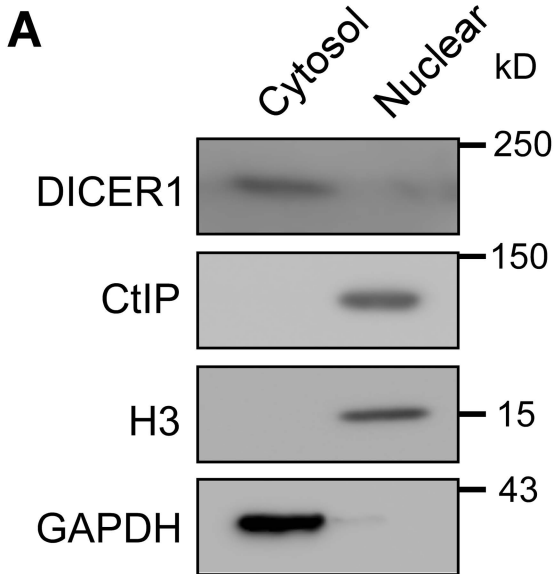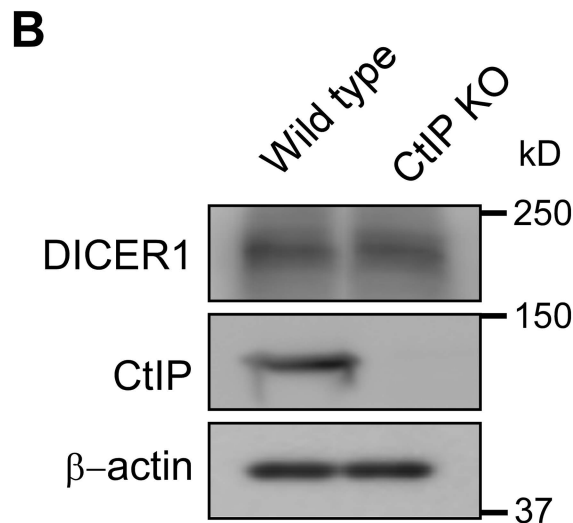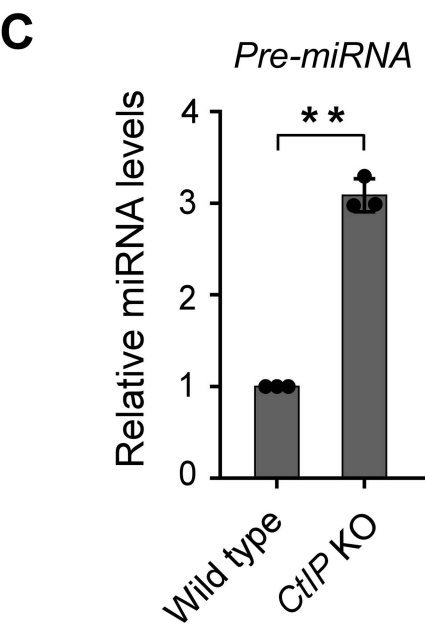

Supplementary Figure 1

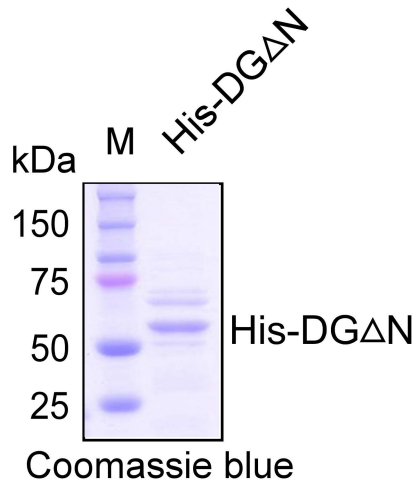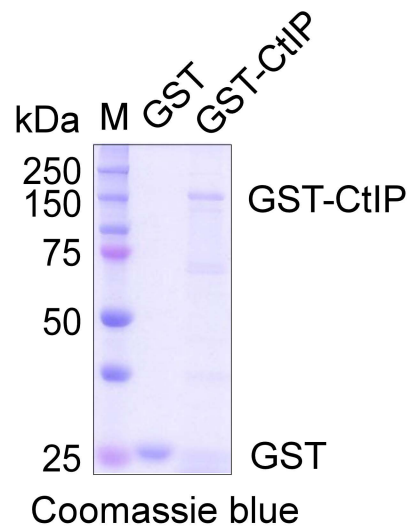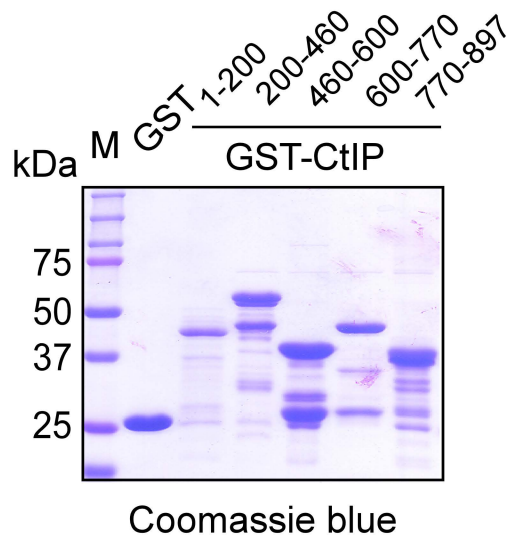

Supplementary Figure 2

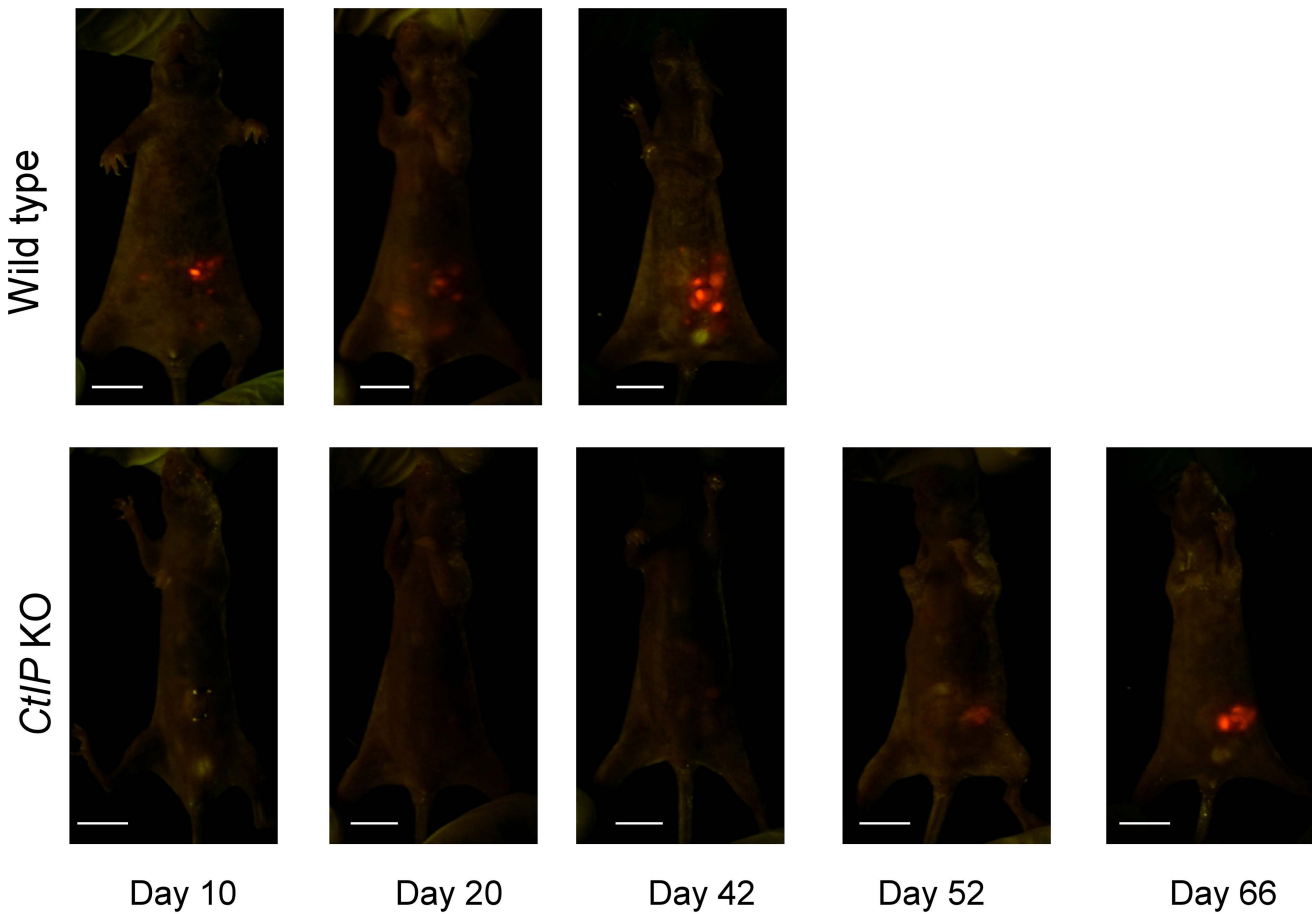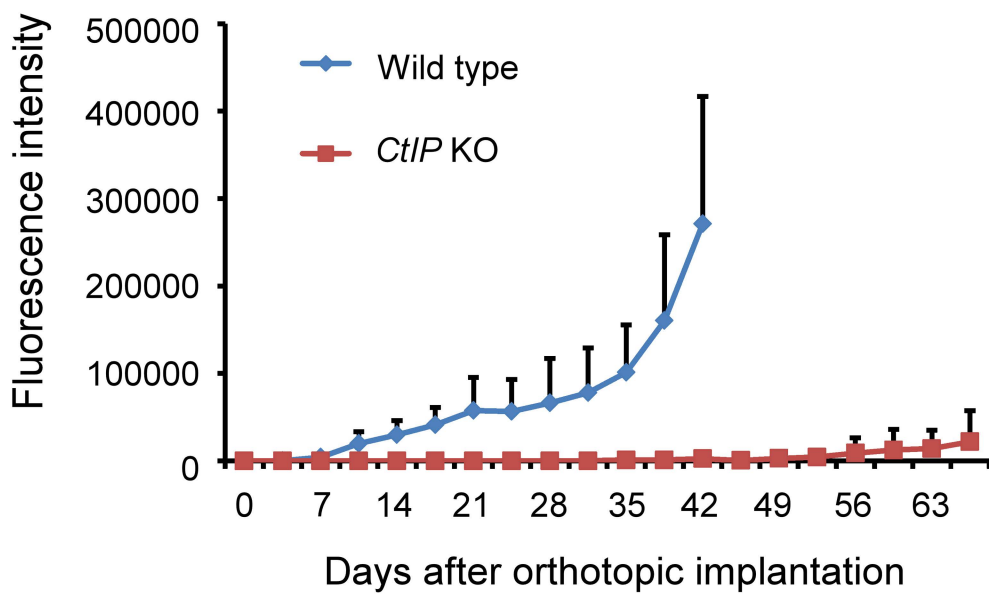

Supplementary Figure 3

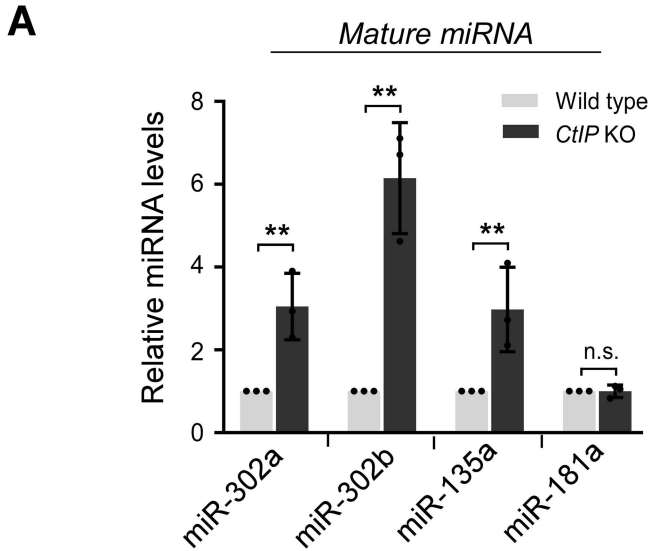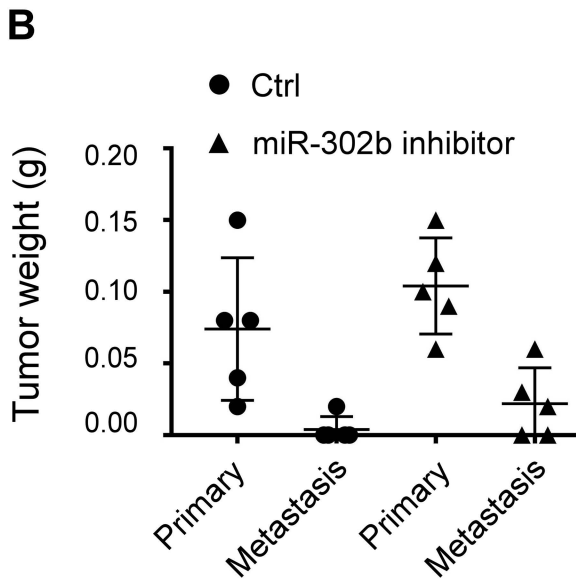

Frequency of metastasis

|                      | Ctrl | miR-302b inhibitor |
|----------------------|------|--------------------|
| Bowel wall           | 0/5  | 3/5                |
| Peritoneal cavity    | 1/5  | 1/5                |
| Mesentery lymph node | 0/5  | 0/5                |
| Liver                | 0/5  | 0/5                |
